# Supplementary material for: Genomic characterization of tobacco/nut chewing HPV-negative early stage tongue tumors identify MMP10 as a candidate to predict metastases
Source: PubMed Central journal article supplement (PMC5628952; doi:10.1016/j.oraloncology.2017.08.003), 2017-10

Supplementary Figure S2

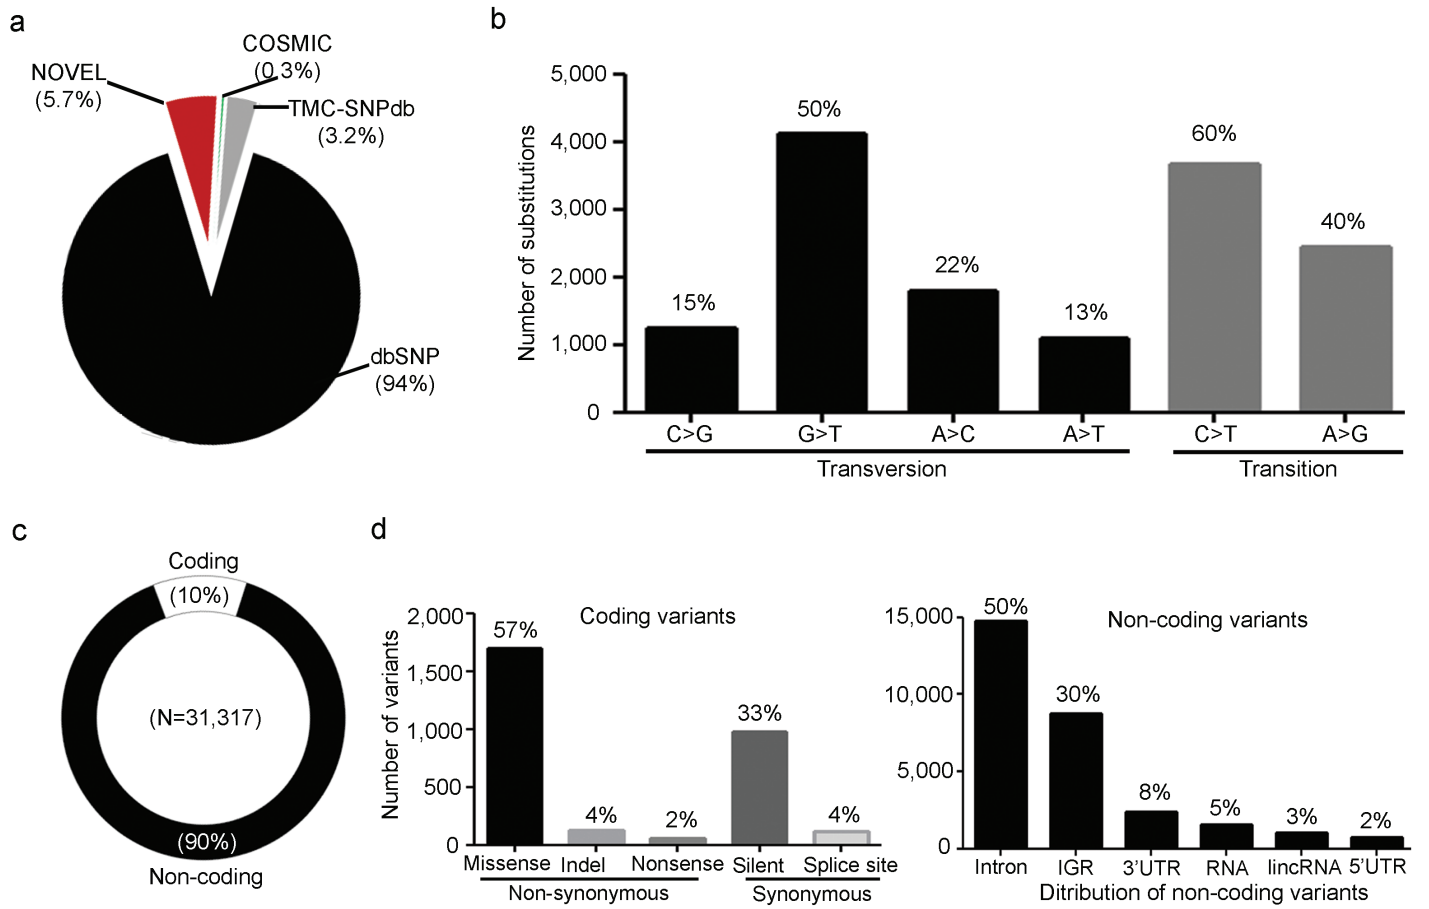

Supplementary Figure S3

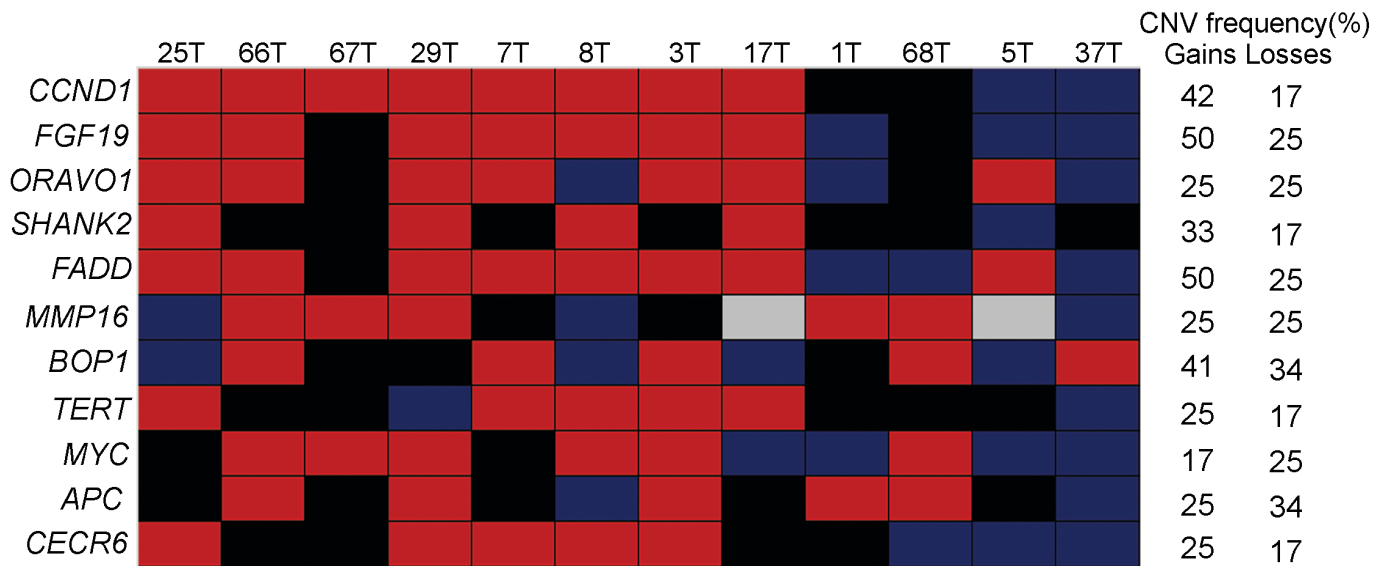



# Supplementary Figure S5

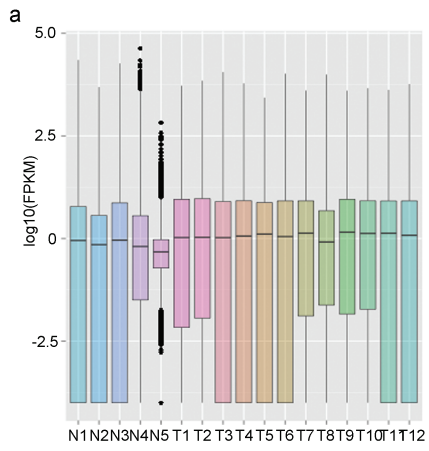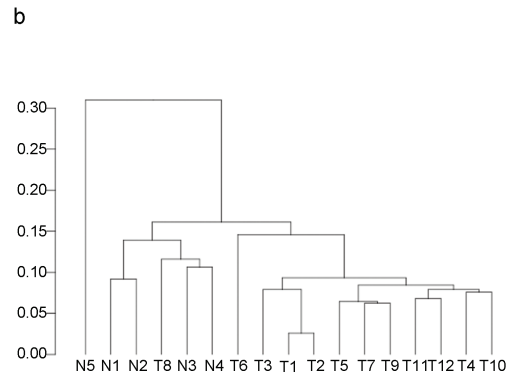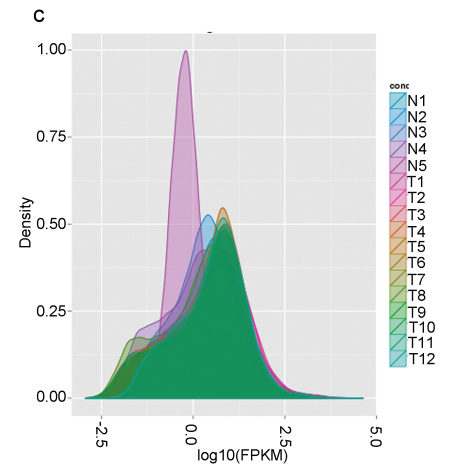

Supplementary Figure S6

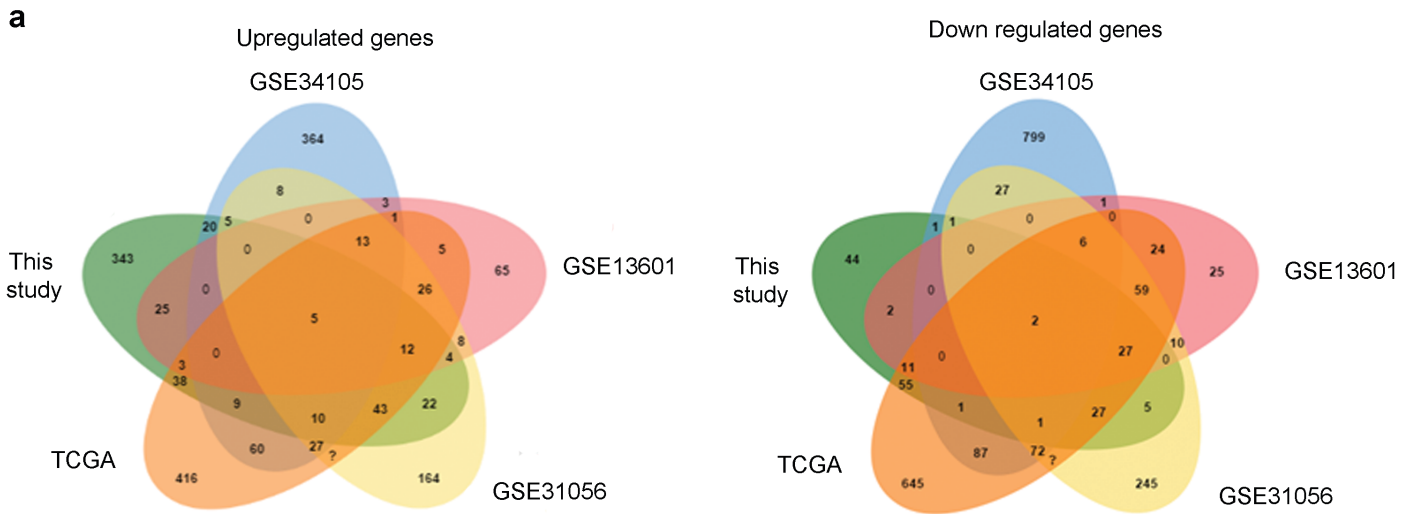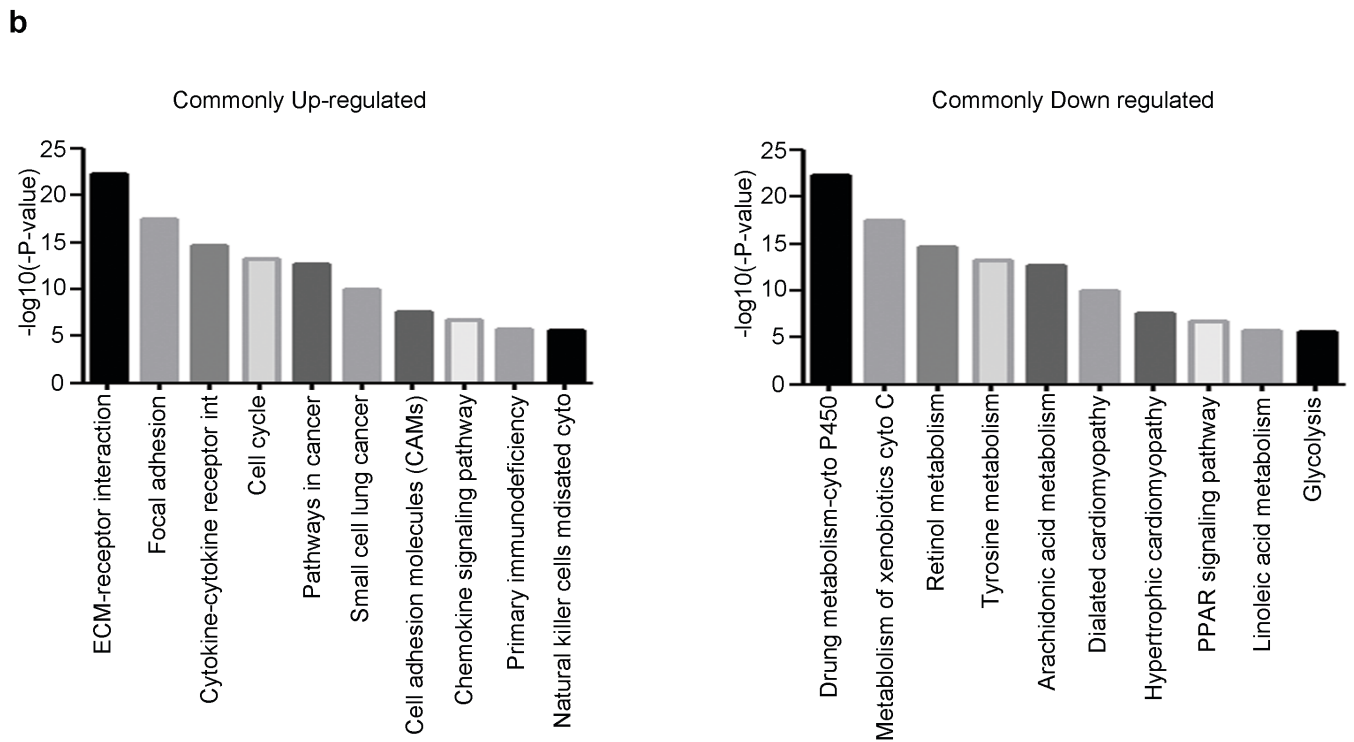

Supplement: mmc4.pdf [file mmc4.pdf]
